# Supplementary material for: Investigation of Microplastics (≥10 μm) in Meconium by Fourier Transform Infrared Microspectroscopy
Source: MDPI journal article supplement (doi:10.3390/toxics11040310), 2023-03-27
Supplement: s1 [file s1]

## Supporting Information

# Investigation of Microplastics ( $\geq 10\ \mu\text{m}$ ) in Meconium by Fourier Transform Infrared Microspectroscopy

Zhiming Li <sup>1,†</sup>, Jiamin Wang <sup>2,†</sup>, Xia Gao <sup>2</sup>, Jiaxin Du <sup>1</sup>, Haixia Sui <sup>3</sup>, Jieling Wu <sup>4</sup>, Yizhou Zhong <sup>1</sup>, Boxuan Liang <sup>1</sup>, Yuji Huang <sup>1</sup>, Rongyi Ye <sup>1</sup>, Yanhong Deng <sup>1</sup>, Xingfen Yang <sup>1</sup> and Zhenlie Huang <sup>1,\*</sup>

<sup>1</sup> NMPA Key Laboratory for Safety Evaluation of Cosmetics, Guangdong Provincial Key Laboratory of Tropical Disease Research, Department of Toxicology, School of Public Health, Southern Medical University, Guangzhou 510515, China

<sup>2</sup> Beijing Key Laboratory of Organic Materials Testing Technology & Quality Evaluation, Institute of Analysis and Testing, Beijing Academy of Science and Technology (Beijing Center for Physical and Chemical Analysis), Beijing 100089, China

<sup>3</sup> Division III of Risk Assessment, China National Center for Food Safety Risk Assessment, Beijing 100022, China

<sup>4</sup> Department of Healthcare, Guangdong Women and Children Hospital, Guangzhou 511442, China

\* Correspondence: huangzhenlie858252@smu.edu.cn; Tel.: +86-20-61648415

† These authors contributed equally to this work.

Prepared for *Toxics*

This Supporting Information contains 2 figures and 1 table.

**Table S1.** The information of protocols and samples used in the initial pretreatments.

| Chemical                         | Protocol                                               | Sample | Dry weight/g |
|----------------------------------|--------------------------------------------------------|--------|--------------|
| Fenton's reagent +               | Phase 1: 280 mL Fenton's                               | 1A     | 1.23         |
| Nitric acid (HNO <sub>3</sub> )  | reagent (H <sub>2</sub> O <sub>2</sub> : iron catalyst | 2A     | 1.35         |
|                                  | solution = 2.5:1) with                                 | 3A     | 1.23         |
|                                  | meconium, lasting less for 5 h                         |        |              |
|                                  | below 40 °C.                                           |        |              |
|                                  | Phase 2: 4 mL 65% HNO <sub>3</sub> is                  |        |              |
|                                  | added and incubated in 90 °C                           |        |              |
|                                  | water bath for 5 h.                                    |        |              |
| Hydrogen peroxide                | 30% H <sub>2</sub> O <sub>2</sub> with human fecal     | 4A     | 0.33         |
| (H <sub>2</sub> O <sub>2</sub> ) | samples (25 mL:3 g) for 9                              | 5A     | 0.20         |
|                                  | months.                                                | 6A     | 0.26         |
| HNO <sub>3</sub>                 | HNO <sub>3</sub> (9 mL) is added to the                | 7A     | 0.31         |
|                                  | samples (0.1 - 0.2 g), allowing to                     | 8A     | 0.20         |
|                                  | stand for 16 h, and then heat at                       | 9A     | 0.21         |
|                                  | 80 °C for 4 h.                                         | 10A    | 0.19         |
|                                  |                                                        | 11A    | 0.18         |

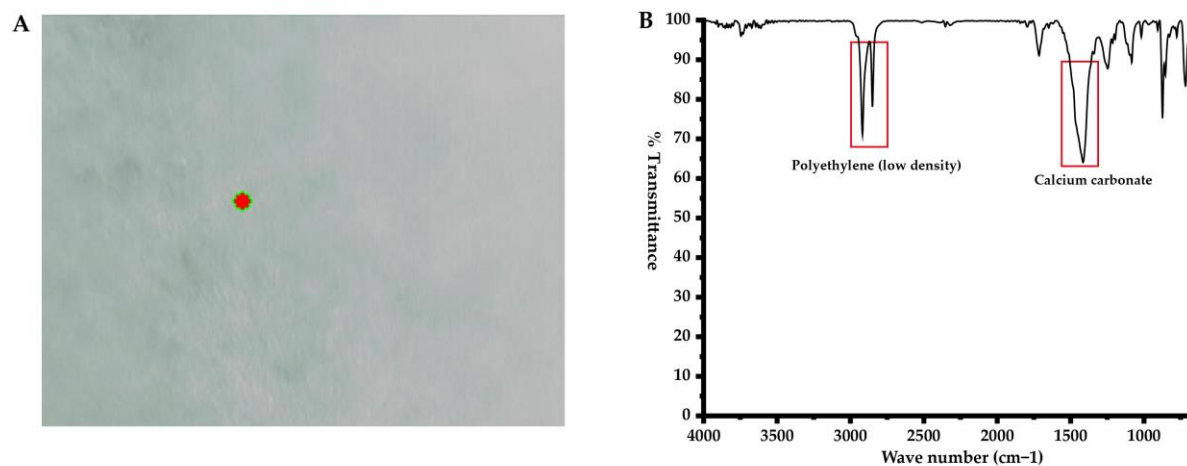

**Figure S1.** The composition of diaper control. (A) Photograph of Fourier transform infrared microspectroscopy (200 × magnification); (B) FTIR spectrum of diaper. The red dot in A indicates the position for detected.

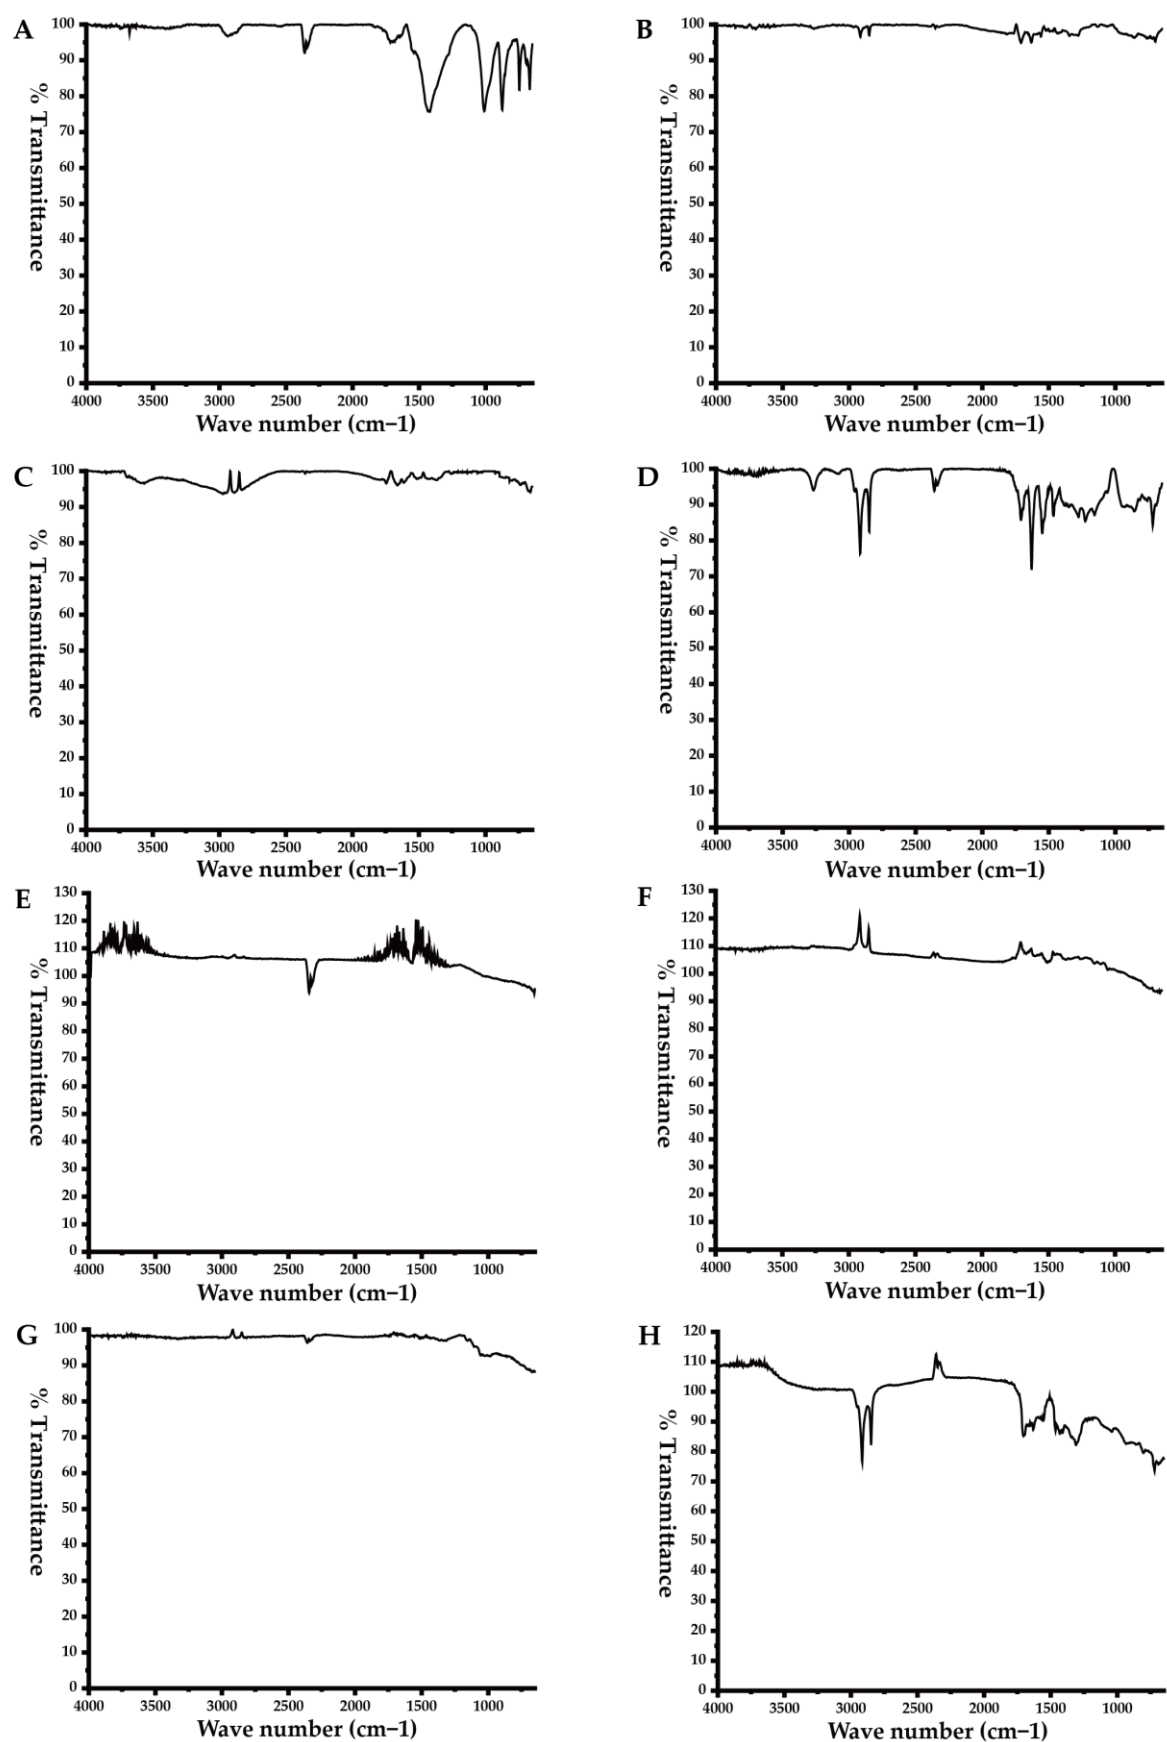

**Figure S2.** FTIR spectra of other potential MPs in the meconium samples from (A) No. 1, (B) No. 9, (C) No.10, (D) No. 15, (E) No. 17, (F,G) No. 32, (H) No. 37.
